# Supplementary material for: Identifying fungal-host associations in an amphibian host system
Source: PLoS One. 2021 Aug 19;16(8):e0256328. doi: 10.1371/journal.pone.0256328 (PMC8376043; doi:10.1371/journal.pone.0256328)
Supplement: S4 Table — Only significant sample types are listed (FDR-corrected p-value < = 0.005). Numbers after younger developmental stages are the specific Gosner stage. This table lists only significantly different pairwise comparisons. Since none of the separate tadpole stages were significantly different and some had low sample size, all tadpole samples were pooled for hypothesis testing. (XLSX) [file pone.0256328.s009.xlsx]

## Sheet: Sheet1
Sample Type 1	Sample Type 1	R2 value	FDR-corrected p-values
Water	Sediment	0.0676608	0.008
Water	Eggs.11.15	0.068271	0.008
Water	Metamorph.40.46	0.0524184	0.008
Water	Subadult	0.0759918	0.008
Water	Adult	0.0945756	0.008
Sediment	Eggs.11.15	0.0774906	0.008
Sediment	Tadpole.25.27	0.0828321	0.008
Sediment	Tadpole.27.29	0.0722623	0.008
Sediment	Metamorph.40.46	0.115424	0.008
Sediment	Subadult	0.110608	0.008
Sediment	Adult	0.16256	0.008
Eggs.11.15	Tadpole.27.29	0.0617868	0.008
Eggs.11.15	Metamorph.40.46	0.0969022	0.008
Eggs.11.15	Subadult	0.128932	0.008
Eggs.11.15	Adult	0.109113	0.008
Tadpole.25.27	Adult	0.0902338	0.008
Tadpole.27.29	Adult	0.0709375	0.008
Metamorph.40.46	Adult	0.107826	0.008
